# Supplementary material for: Highly efficient and completely flexible fiber-shaped dye-sensitized solar cell based on TiO2 nanotube array
Source: Royal Society of Chemistry journal article supplement (doi:10.1039/c2nr11532h), 2012-01-01
Supplement: c2nr11532h.pdf [file c2nr11532h.pdf]

## Supplementary Information

### Highly Efficient Completely Flexible Fiber-Shaped Dye-sensitized Solar Cell Based on TiO<sub>2</sub> Nanotube Array

Zhibin Lv, **Jiefeng Yu**, Hongwei Wu, Dan Wang, Shaocong Hou, Yongping Fu, **Kai Wu\***  
and Dechun Zou\*

*Beijing National Laboratory for Molecular Sciences, Key Laboratory of Polymer Chemistry  
and Physics of Ministry of Education, College of Chemistry and Molecular Engineering,  
Peking University, Beijing 100871, Email: dczou@pku.edu.cn*

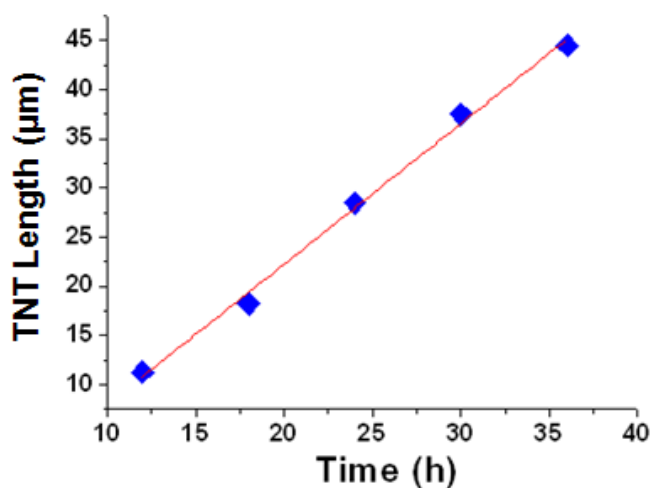

Fig.1. TiO<sub>2</sub> nanotube length varies with anodization Time. TNT:TiO<sub>2</sub> nanotube.

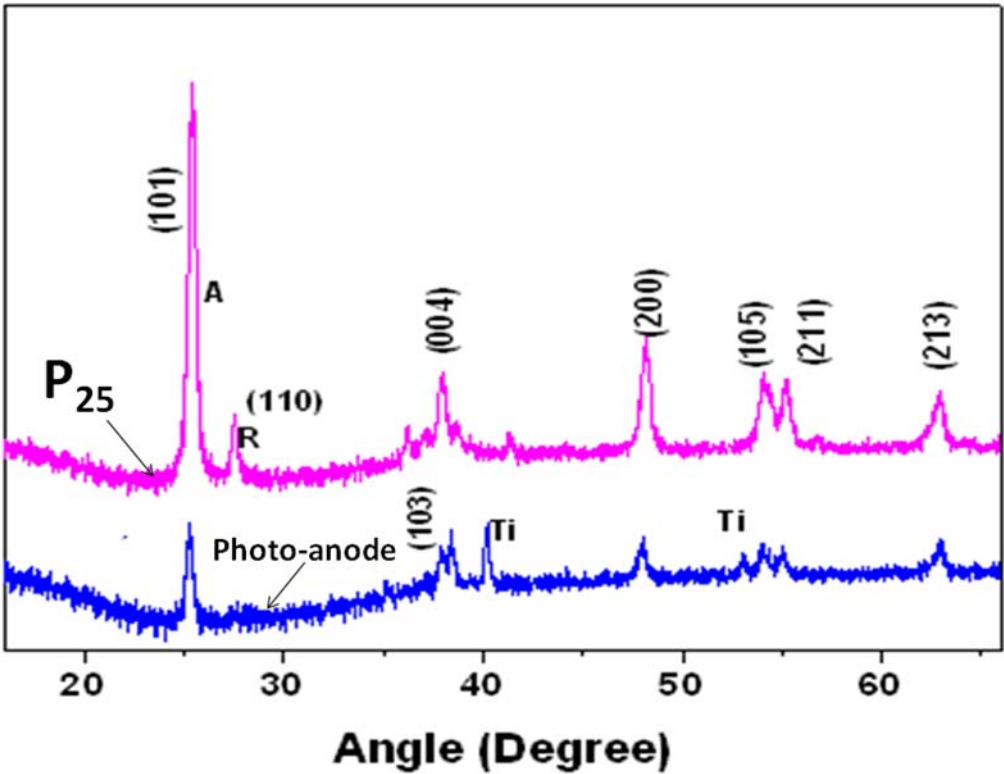

Fig.2. XRD characteristic of TiO<sub>2</sub> nanotube based photo-anode and commercial P25 nanoparticle after annealing at 450 °C.

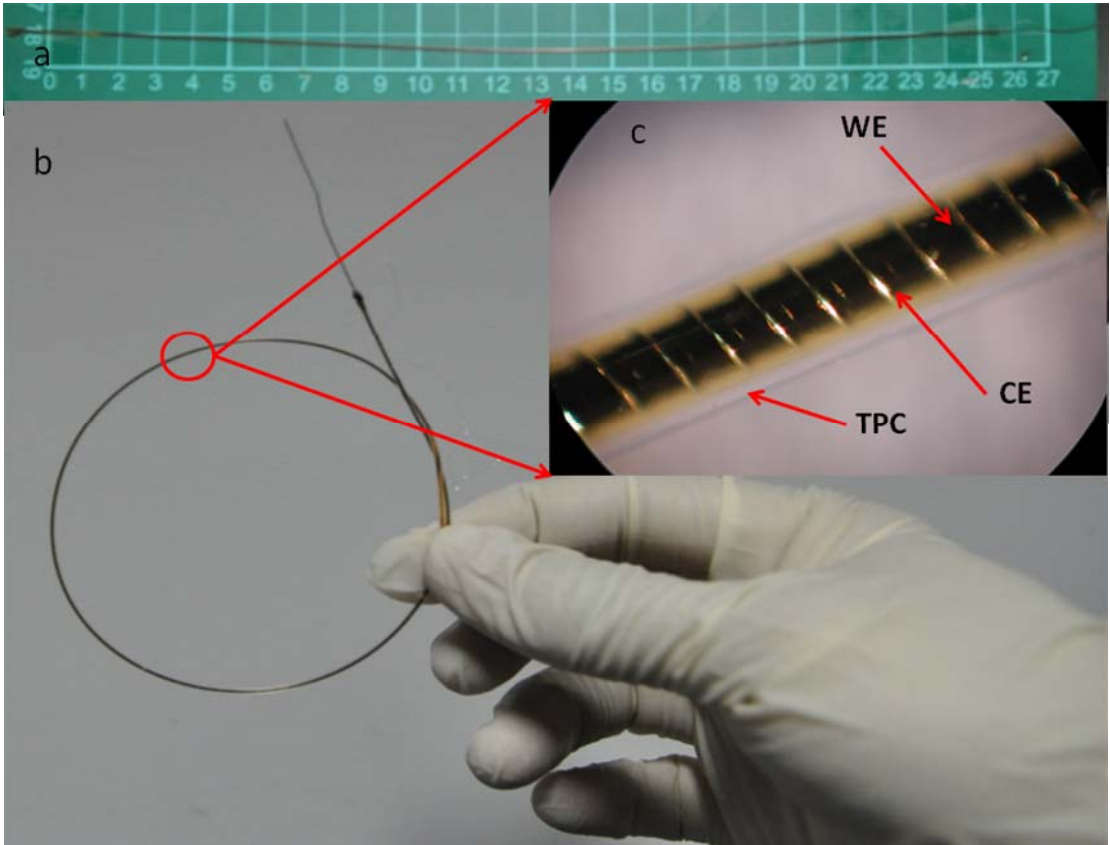

Fig.3. (a) Actual optical photo of a 24cm-long flexible fiber-shaped cell;(b) a flexible solar cell coil;  
(c) Internal structure of the flexible fiber-shaped cell under the optical microscope

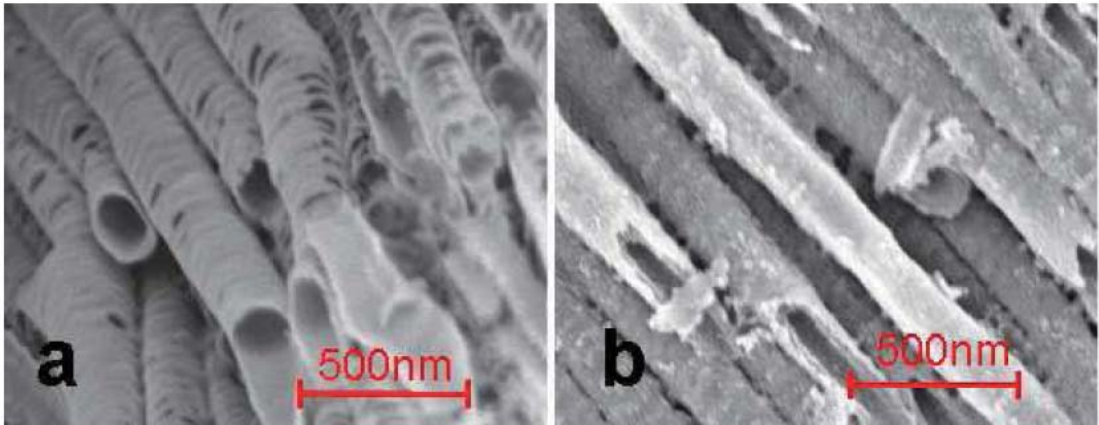

Fig4.(a)Side view of TiO<sub>2</sub> array before TiCl<sub>4</sub> Treated;(b) Side view of TiO<sub>2</sub> array after TiCl<sub>4</sub> treated.
